# Supplementary material for: Dynamics of type IV collagen 7S fragment on eradication of HCV with direct antiviral agents: Prognostic and metabolomic impacts
Source: PubMed Central journal article supplement (PMC9612469; doi:10.1371/journal.pone.0276925), 2022-10-27
Supplement: pone.0276925.s001.pdf [file pone.0276925.s001.pdf]

# 1 Supporting Information

## 2 Supporting Figures and Legends

### 3 S1 Fig.

A

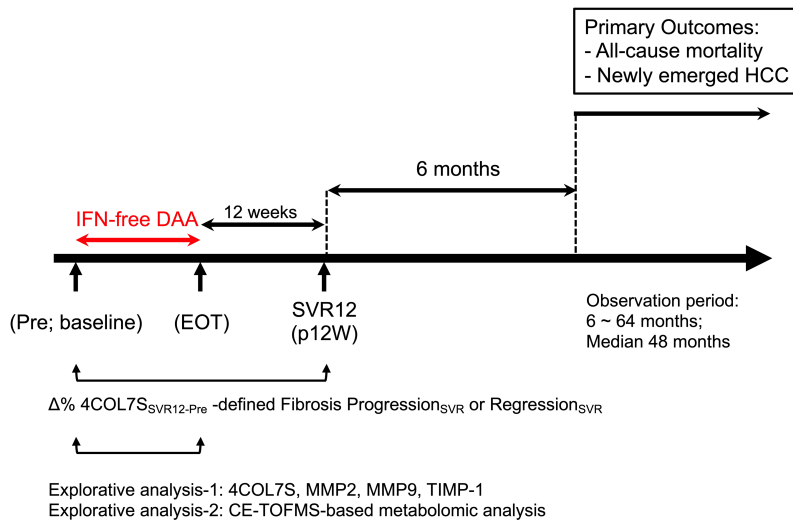

B

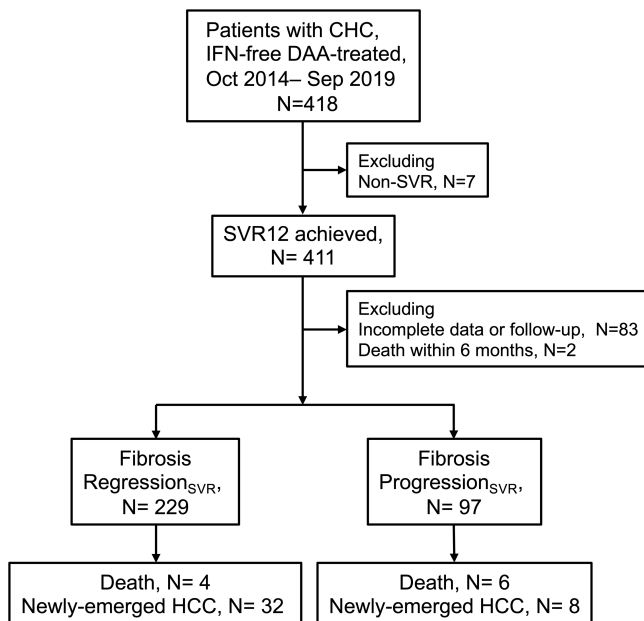

**S1 Fig**  
Yamataka et al.

4

5 **S1 Fig. Study design, sampling timepoints, and inclusion flow.** The red arrow in panel A

6 represents the duration of treatment with IFN-free direct antiviral agents.

7 Abbreviations: IFN, interferon; DAAs, direct antiviral agents; Pre, pre-treatment; EOT, end of  
8 treatment; p12w, 12 weeks after treatment; SVR12, sustained virological response at 12  
9 weeks after the end of treatment; HCC, hepatocellular carcinoma; 4COL7S, type IV collagen  
10 7S fragment; MMP, matrix metalloproteinase; TIMP, tissue inhibitor of metalloproteinase.

11

## 12 S2 Fig.

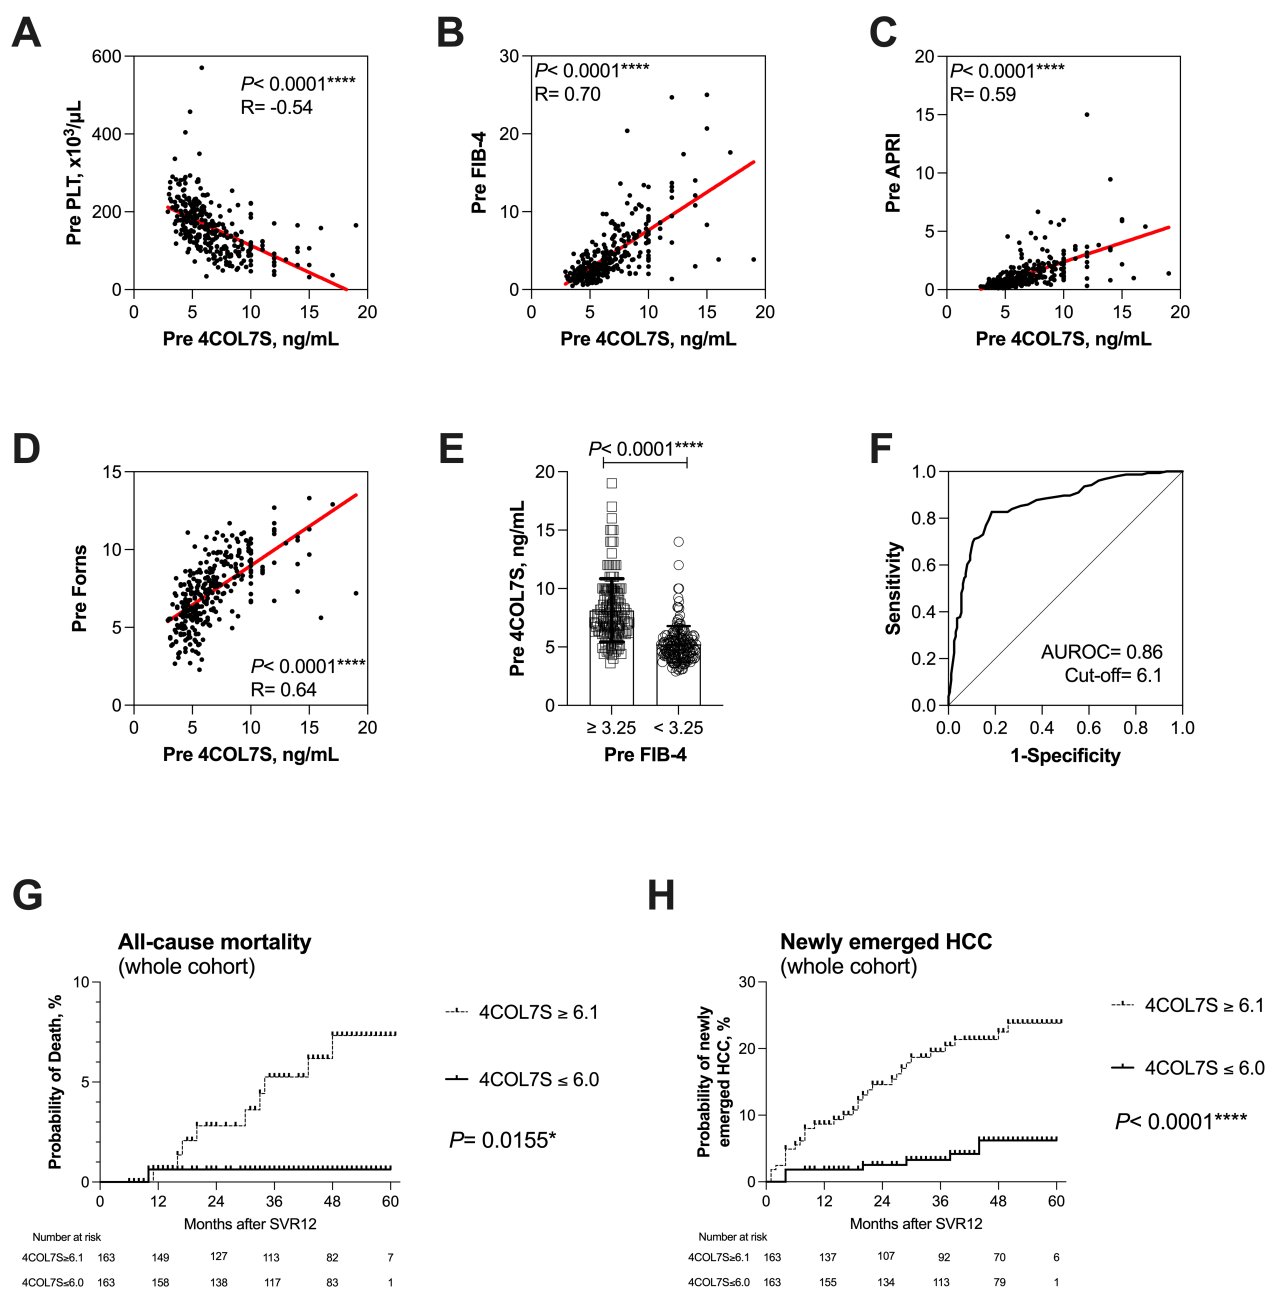

13

14 **S2 Fig. Correlations between pre-treatment 4COL7S, non-invasive fibrosis indicators**  
 15 **and post-SVR clinical outcomes in patients with chronic hepatitis C.**

16 In 326 patients with CHC included in this study, correlations between pre-treatment serum

17 levels of 4COL7S and platelet counts (A), FIB-4 (B), APRI (C), and Forns indices (D) are

18 shown. (E) 4COL7S levels are compared based on stratifying patients with FIB-4  $\geq 3.25$ ,

19 which indicated advanced fibrosis. (F) An ROC analysis for serum levels of 4COL7S

20 diagnosing FIB-4  $\geq$  3.25 is shown. A cutoff of 6.1 is yielded from the Youden index. (G, H)

21 Kaplan-Meier analyses of all-cause mortality and new emergence of HCC post-SVR stratified

22 by baseline 4COL7S. Data are presented as means with standard deviations. \* $P < 0.05$ ; \*\*\*\* $P$

23  $< 0.0001$ . Abbreviations: SVR, sustained virological response; 4COL7S, type IV collagen 7S

24 fragment; CHC, chronic hepatitis C; ROC, receiver operating characteristic; AUROC, area

25 under the ROC curve.

26

27 **S3 Fig.**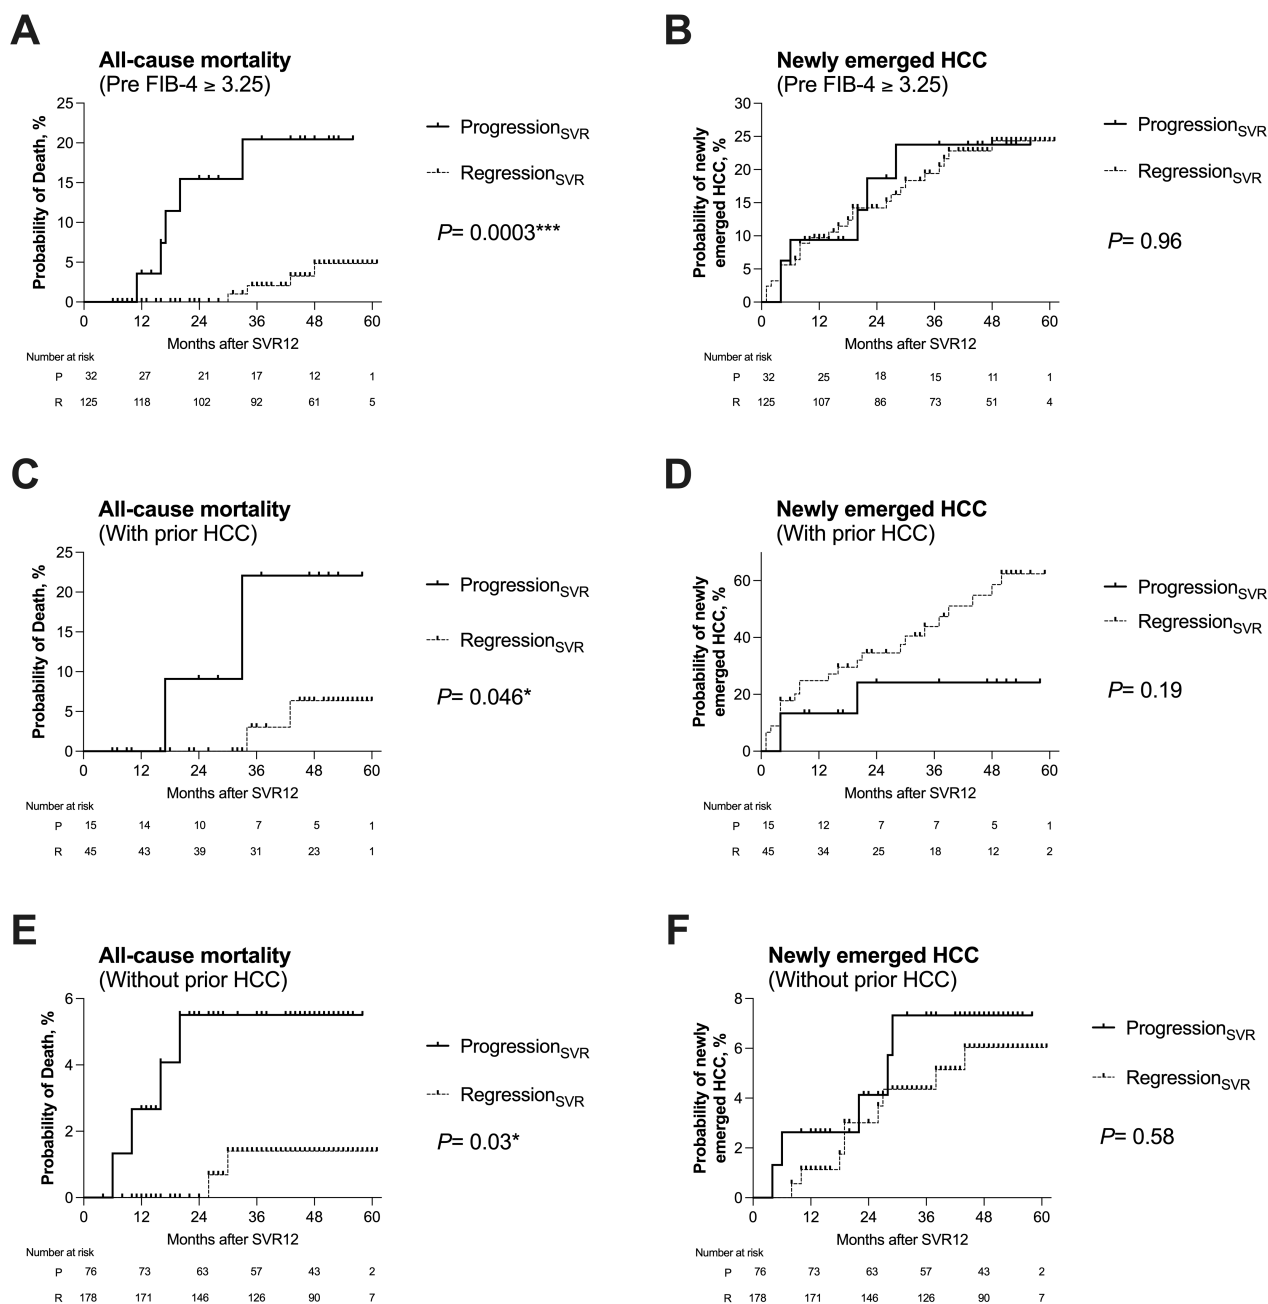

28

29 **S3 Fig. Kaplan-Meier analyses of all-cause mortality and new emergence of HCC post-**30 **SVR stratified by 4COL7S-defined fibrosis progression<sub>SVR</sub> and regression<sub>SVR</sub>.**31 A comparison of 4COL7S-defined fibrosis progression<sub>SVR</sub> and regression<sub>SVR</sub>, all-cause

32 mortality (A, C, E), and accumulative frequency of newly emerged HCC (B, D, F) are

33 evaluated in SVR12 in patients whose baseline FIB-4 indices  $\geq$  3.25 ng/mL (N= 157; A-B) or34 in patients with prior HCC (n= 60, C-D) or in those without (n= 254, E-F). \* $P < 0.05$ ; \*\*\* $P$

35 <0.001. Abbreviations: 4COL7S, type IV collagen 7S fragment; P, progression<sub>SVR</sub>; R,  
36 regression<sub>SVR</sub>; SVR12, sustained virological response at 12 weeks after the end of treatment;  
37 HCC, hepatocellular carcinoma  
38

39 **S4 Fig.**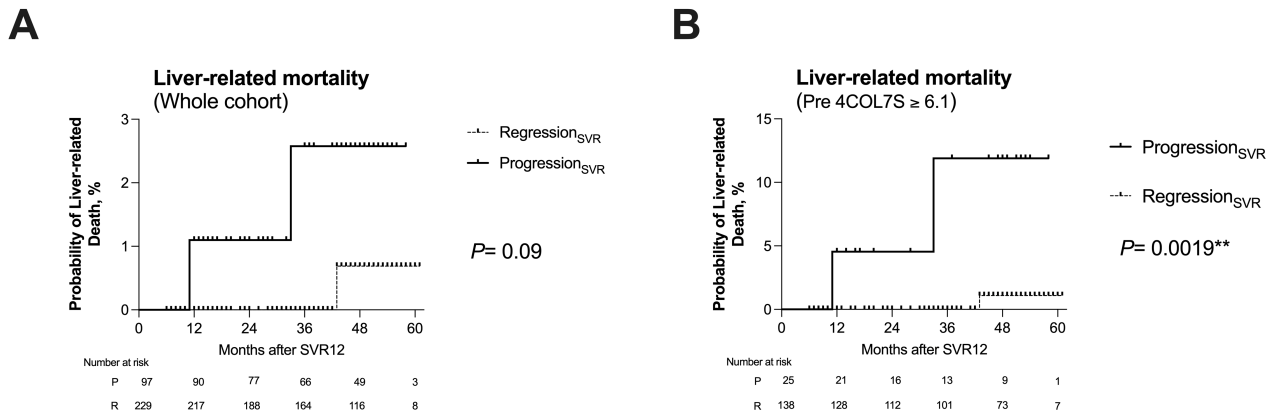

40

41 **S4 Fig. Kaplan-Meier analyses of liver-related mortality post-SVR stratified based on**42 **4COL7S-defined fibrosis progression<sub>SVR</sub> and regression<sub>SVR</sub>.**43 A comparison of 4COL7S-defined fibrosis progression<sub>SVR</sub> and regression<sub>SVR</sub>, liver-related

44 mortality is evaluated from SVR12 in 326 IFN-free DAA-treated patients achieving SVR

45 (whole cohort, A) or in those with baseline serum levels of 4COL7S  $\geq 6.1$  ng/mL (N= 163,46 B).  $^{**}P < 0.01$ . Abbreviations: 4COL7S, type IV collagen 7S fragment; P, progression<sub>SVR</sub>; R,47 regression<sub>SVR</sub>; SVR12, sustained virological response at 12 weeks after the end of treatment;

48 IFN, interferon; DAAs, direct antiviral agents.

49

50 **S5 Fig.**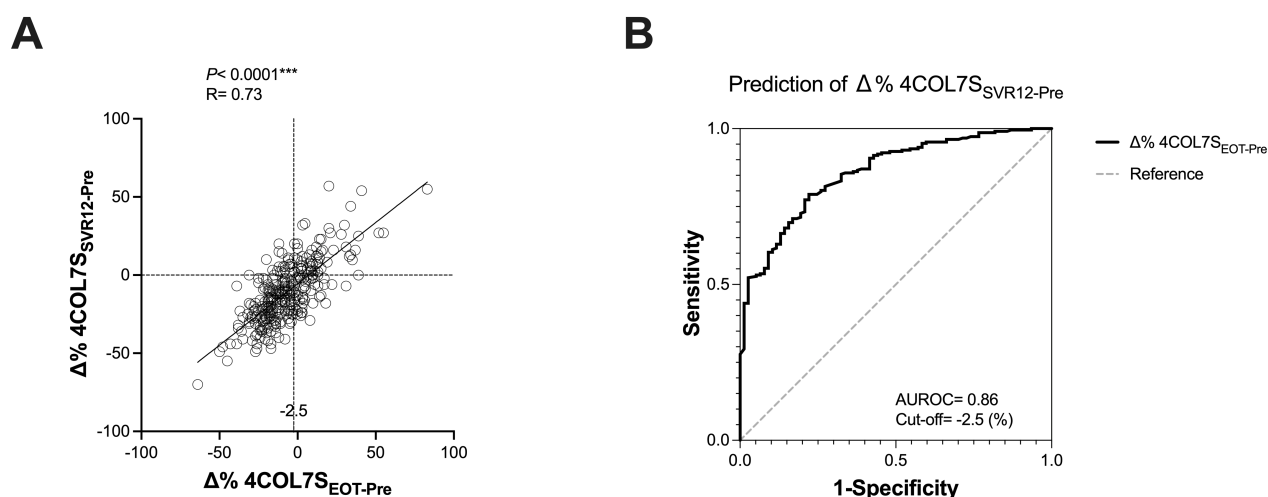

51

52 **S5 Fig. Correlations and diagnostic ability between the change rates of 4COL7S at**  
 53 **EOT and at SVR12.**

54 In 326 IFN-free DAA-treated patients achieving SVR, the Spearman correlation analysis  
 55 between the change rates of serum 4COL7S at EOT ( $\Delta\% 4COL7S_{EOT-Pre}$ ) and at SVR12 ( $\Delta\%$   
 56  $4COL7S_{SVR12-Pre}$ ) is shown (panel A). The diagnostic ability of  $\Delta\% 4COL7S_{EOT-Pre}$  for  $\Delta\%$   
 57  $4COL7S_{SVR12-Pre} \geq 0$  by ROC analysis is shown (panel B). A cutoff of  $-2.5\%$  is obtained from  
 58 the Youden index. Abbreviations: 4COL7S, type IV collagen 7S fragment; EOT, end of  
 59 treatment; SVR12, sustained virological response at 12 weeks after the end of treatment;  
 60 IFN, interferon; DAAs, direct antiviral agents; ROC, receiver operating characteristic  
 61



62 **S6 Fig.**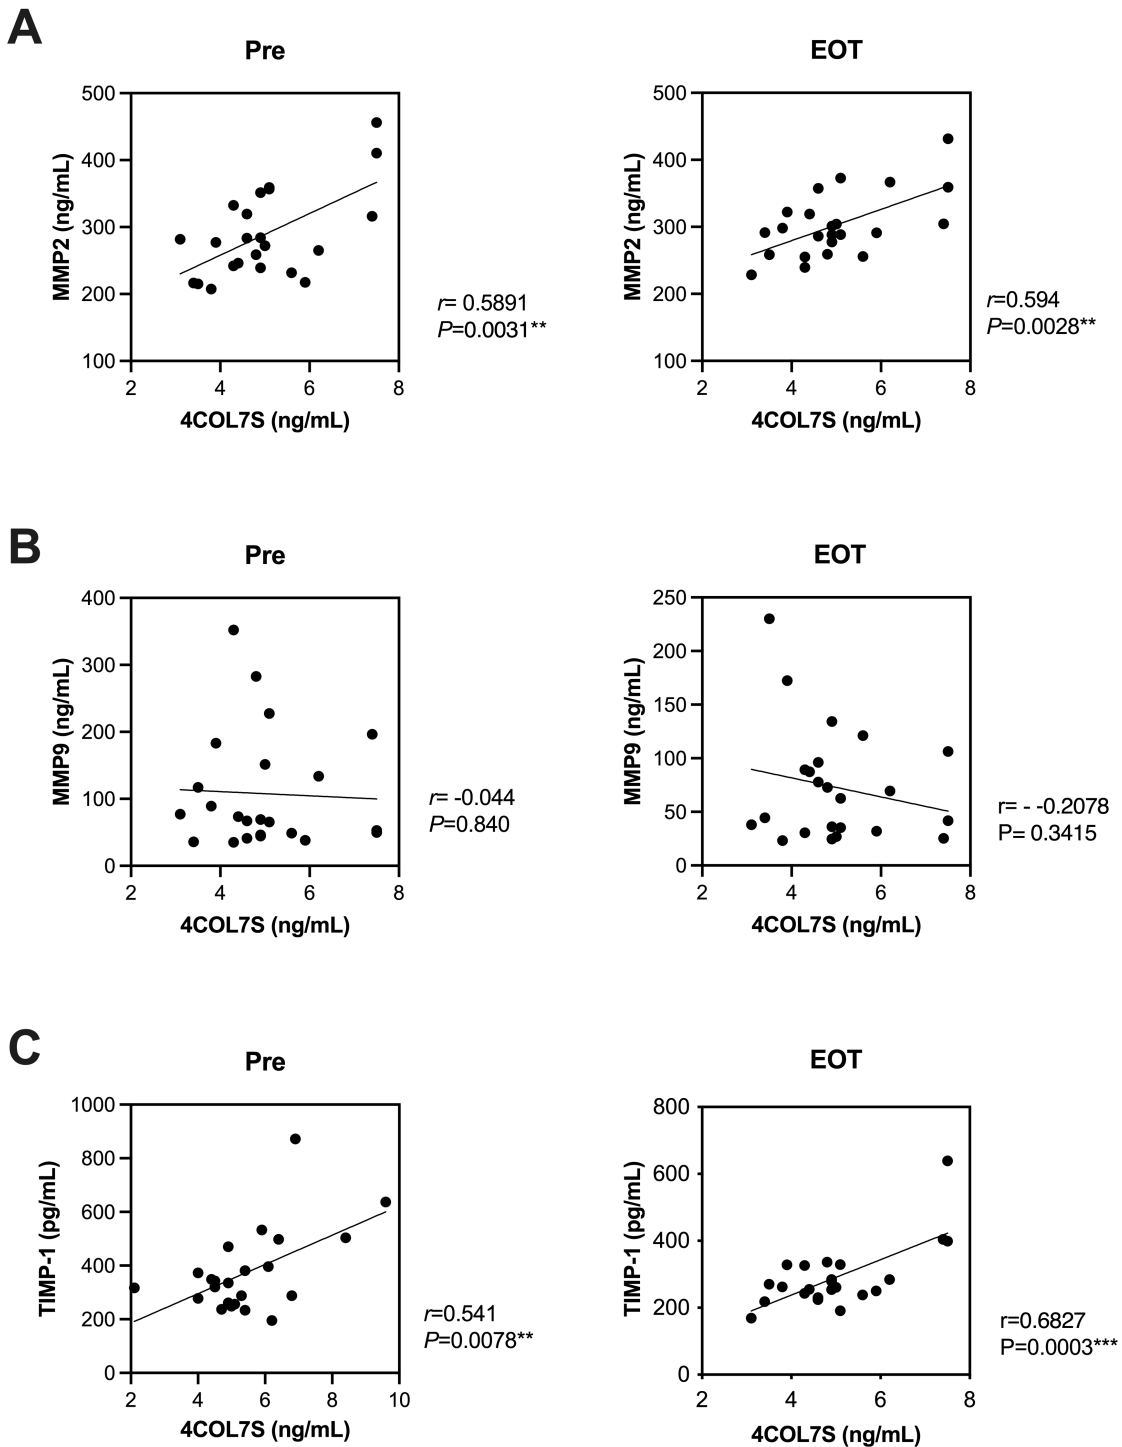

63

64 **S6 Fig. Correlations between serum 4COL7S and MMP2, MMP9, and TIMP-1 before**65 **treatment and at EOT**

66 In the exploratory analysis involving 23 IFN-free DAA-treated patients achieving SVR,

67 correlations between serum 4COL7S and (A) MMP2, (B) MMP9, or (C) TIMP-1, at pre and

68 EOT, respectively, are shown.  $**P < 0.01$ ;  $***P < 0.001$ . Abbreviations: 4COL7S, type IV  
69 collagen 7S fragment; EOT, end of treatment; IFN, interferon; DAAs, direct antiviral agents;  
70 Pre, pre-treatment.

71

72 **S7 Fig.**

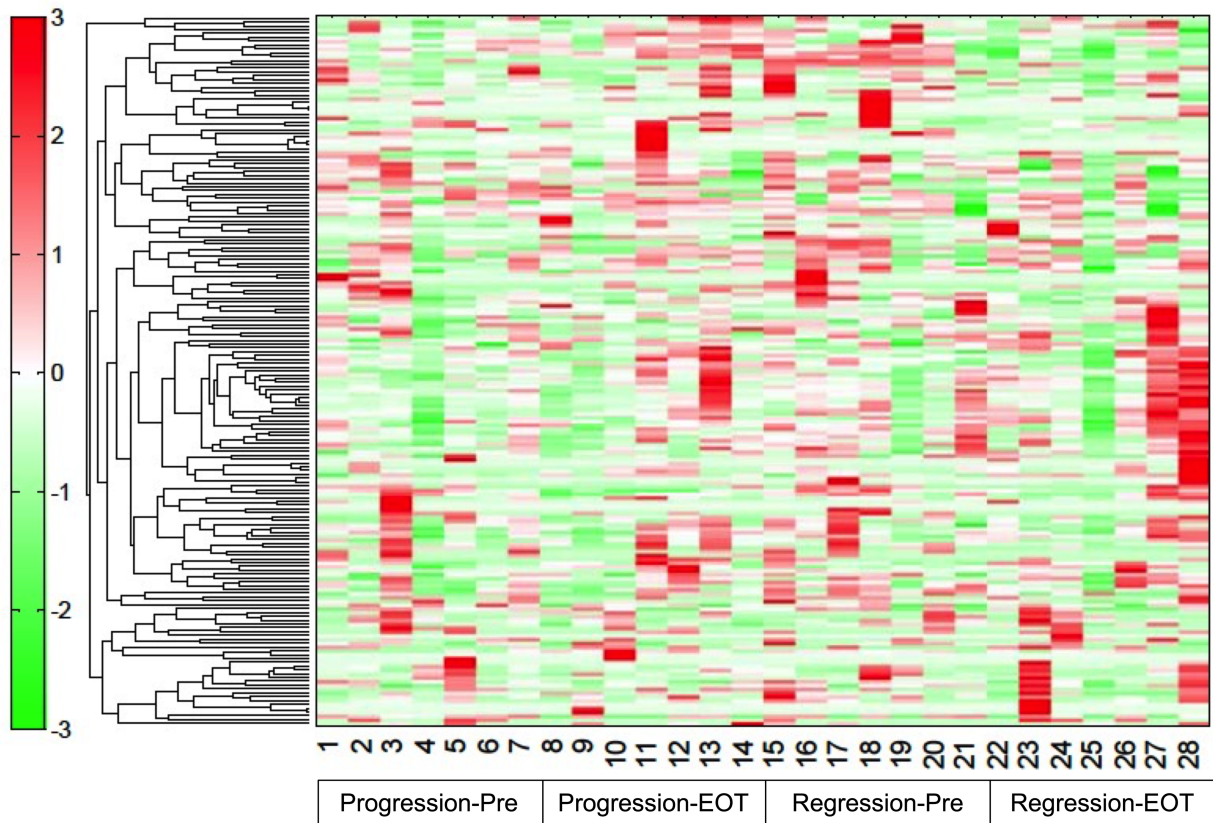

73

74 **S7 Fig. Hierarchical cluster analysis of metabolic patterns in exploratory analysis 2.**

75 Abbreviations: Pre, pre-treatment; EOT, end of treatment.

76

77 **Supporting Tables S1-S4**78 **S1 Table. Clinical features of censored deaths during observation**

|    | Sex | Age | Months to death (from SVR12) | Prior HCC | Baseline Platelet, $\times 10^4/\mu\text{L}$ | Pre 4COL7S, ng/mL | SVR12 4COL7S, ng/mL | 4COL7S-defined P/R | Causes of death          |
|----|-----|-----|------------------------------|-----------|----------------------------------------------|-------------------|---------------------|--------------------|--------------------------|
| 1  | M   | 91  | 34                           | Y         | 10.3                                         | 6.1               | 5.6                 | R                  | Cholangiocarcinoma       |
| 2  | F   | 81  | 17                           | Y         | 6.7                                          | 6.9               | 7.5                 | P                  | Malignant Myeloma        |
| 3  | M   | 53  | 11                           | N         | 9.0                                          | 8.3               | 7.5                 | P                  | HCC                      |
| 4  | M   | 57  | 30                           | N         | 7.4                                          | 10                | 8.9                 | R                  | CPA                      |
| 5  | F   | 79  | 20                           | N         | 13.9                                         | 6.3               | 7.1                 | P                  | Gastric cancer           |
| 6  | F   | 79  | 43                           | Y         | 8.0                                          | 12                | 11                  | R                  | HCC                      |
| 7  | M   | 65  | 33                           | Y         | 6.4                                          | 7.9               | 12                  | P                  | HCC                      |
| 8  | F   | 78  | 48                           | N         | 9.2                                          | 8                 | 8.4                 | R                  | Thyroid cancer           |
| 9  | F   | 78  | 16                           | N         | 8.9                                          | 10                | 11                  | P                  | Interstitial pneumonitis |
| 10 | M   | 81  | 10                           | N         | 21.1                                         | 3.3               | 3.4                 | P                  | CPA                      |

79

80 Abbreviations: M, male; F, female; SVR12, sustained virological response at week 12 after end of treatment; Y, yes; N, no; HCC, hepatocellular carcinoma; 4COL7S, type IV collagen 7S fragment; P, progression; R, regression; CPA, cardiopulmonary arrest.

81

82

83

84

85 **S2 Table. Background clinical parameters stratified based on their fibrosis dynamics.**

| Baseline parameters            | Regression <sub>SVR</sub> † | Progression <sub>SVR</sub> † | P           |
|--------------------------------|-----------------------------|------------------------------|-------------|
| N                              | 229                         | 97                           | -           |
| Sex (M/F), N (%)               | 82 (35.8) / 147 (64.2)      | 36 (37.1) / 61 (62.9)        | 0.90        |
| Age, years                     | 70.4± 12.0                  | 70.3± 12.2                   | 0.92        |
| SOF-based DAAs, N (%)          | 147 (64.2)                  | 62 (63.9)                    | 1.00        |
| Prior history of HCC, N (%)    | 45 (20.2)                   | 15 (16.5)                    | 0.53        |
| Liver transplanted, N (%)      | 8 (3.5)                     | 3 (3.1)                      | 1.00        |
| 4COL7S, ng/mL                  | 7.3± 2.6                    | 5.2± 1.9                     | <0.0001**** |
| AST, IU/L                      | 59.9± 44.5                  | 36.5± 19.7                   | <0.0001**** |
| ALT, IU/L                      | 57.8± 47.5                  | 35.1± 28.2                   | <0.0001**** |
| γGTP, IU/L                     | 34 [23-59.5]                | 24 [16-38]                   | <0.0001**** |
| Platelet, ×10 <sup>4</sup> /μL | 15.2± 7.0                   | 17.9± 5.9                    | 0.0013**    |
| FIB-4 index                    | 5.30± 7.53                  | 3.10± 2.58                   | 0.0069**    |
| APRI                           | 1.75± 4.20                  | 0.73± 0.68                   | 0.0221*     |
| Forns index                    | 7.59± 2.21                  | 6.59± 1.90                   | 0.0002***   |

86

87 Data are shown as mean ±SD or median with interquartile range in brackets, as appropriate.

88 † 4COL7S-defined fibrosis progression<sub>SVR</sub> or regression<sub>SVR</sub>: a change rate of serum 4COL7S from pre-treatment to SVR12≥ 0% is89 defined as fibrosis progression<sub>SVR</sub>; and < 0% is defined as fibrosis regression<sub>SVR</sub>.

90 Abbreviations: SOF, sofosbuvir; DAA, direct antiviral agents; HCC, hepatocellular carcinoma; 4COL7S, type IV collagen 7S fragment;

91 AST, aspartate aminotransferase; ALT, alanine aminotransferase; γGTP, γ-glutamyl transpeptidase.

92

93

94 **S3 Table. Background parameters and clinical outcomes of study participants in**  
 95 **exploratory analysis 1.**

| Parameters                          | Exploratory analysis 1 |
|-------------------------------------|------------------------|
| N                                   | 23                     |
| Background parameters               |                        |
| Sex (M/F), N (%)                    | 7 (30.4) / 16 (69.6)   |
| Age, years                          | 70 ± 8                 |
| SOF-based DAA, N (%)                | 18 (78.3)              |
| Prior history of HCC, N (%)         | 3 (13.0)               |
| Liver transplanted, N (%)           | 1 (4.3)                |
| Non-invasive fibrosis parameters    |                        |
| Pre 4COL7S, ng/mL                   | 5.99 ± 1.5             |
| EOT 4COL7S, ng/mL                   | 5.56 ± 1.7             |
| SVR12 4COL7S, ng/mL                 | 5.20 ± 1.3             |
| Clinical Outcomes                   |                        |
| Newly emerged HCC post SVR12, N (%) | 2 (8.6)                |
| All-cause mortality, N (%)          | 1 (4.3)                |

96 Data are shown as mean ± standard deviation.

97 Abbreviations: M, male; F, female; SOF, sofosbuvir; DAAs, direct antiviral agents; Pre, pre-treatment; 4COL7S, type IV collagen 7S  
 98 fragment; EOT, end of treatment; HCC, hepatocellular carcinoma; SVR12, sustained virological response at week 12 after the end of  
 99 treatment.

100  
 101

102

103 **S4 Table. Detailed background parameters of study subject for exploratory analysis 2**

| Progression/<br>Regression† | Sex  | Age,<br>years | SOF-<br>based | Prior<br>HCC | Survival | Post-<br>SVR<br>HCC | Pre<br>FIB-<br>4 | Pre<br>eGFR§ | F/U,<br>months | Pre<br>4COL7S | EOT<br>4COL7S |
|-----------------------------|------|---------------|---------------|--------------|----------|---------------------|------------------|--------------|----------------|---------------|---------------|
| Progression                 | M    | 80            | Y             | N            | Y        | N                   | 1.77             | 53           | 27             | 4.7           | 5             |
| Progression                 | F    | 82            | Y             | Y            | Y        | N                   | 3.29             | 48           | 51             | 5.6           | 6.1           |
| Progression                 | F    | 53            | N             | N            | Y        | N                   | 1.87             | 87           | 45             | 4.2           | 4.8           |
| Progression                 | F    | 40            | Y             | N            | Y        | N                   | 1.20             | 67           | 50             | 4             | 4.6           |
| Progression                 | F    | 48            | Y             | N            | Y        | N                   | 1.18             | 54           | 54             | 4.2           | 4.4           |
| Progression                 | F    | 74            | Y             | N            | Y        | N                   | 2.25             | 63           | 48             | 4.2           | 5.6           |
| Progression                 | F    | 82            | Y             | Y            | Y        | Y                   | 6.78             | 54           | 28             | 7.0           | 7.6           |
| Regression                  | F    | 60            | Y             | N            | Y        | N                   | 2.15             | 82           | 32             | 8.4           | 7.4           |
| Regression                  | F    | 60            | Y             | N            | Y        | N                   | 4.98             | 75           | 15             | 6.4           | 4.9           |
| Regression                  | F    | 74            | Y             | N            | Y        | N                   | 4.42             | 67           | 52             | 6.3           | 6             |
| Regression                  | M    | 67            | Y             | N            | Y        | N                   | 2.70             | 59           | 48             | 4.7           | 4.1           |
| Regression                  | M    | 73            | Y             | N            | Y        | N                   | 1.61             | 65           | 52             | 4.9           | 4.3           |
| Regression                  | F    | 42            | Y             | N            | Y        | N                   | 1.35             | 70           | 49             | 5.3           | 4.3           |
| Regression                  | F    | 56            | Y             | N            | Y        | N                   | 3.26             | 63           | 49             | 5.3           | 4.8           |
| Statistics (P)              | 1.00 | 0.56          | 1.00          | 0.46         | 1.00     | 1.00                | 0.64             | 0.20         | 0.95           | 0.12          | 0.60          |

104

105

106

107

108

109

† 4COL7S-defined fibrosis progression or regression: a change rate of serum 4COL7S from pre-treatment to EOT  $\geq$  0% is defined as progression, and  $<$  0% is defined as regression.

§ Unit: mL/min.1.73m<sup>2</sup>.

Abbreviations: SOF, sofosbuvir; HCC, hepatocellular carcinoma; 4COL7S, type IV collagen 7S fragment; eGFR, estimated glomerular filtration rate; Pre, pre-treatment; EOT, end of treatment; SVR, sustained virological response.

110

111 **S5 Table. Datasets used for analysis (excel file)**

112
